# Supplementary material for: An optimized protocol for high precision measurement of 87Sr/86Sr using a Neptune Plus multi-collector inductively coupled plasma mass spectrometer: evaluation of different cone combinations for Sr isotope determination
Source: Royal Society of Chemistry journal article supplement (doi:10.1039/d0ay00845a), 2020-01-01
Supplement: d0ay00845a1.xlsx [file d0ay00845a1.xlsx]

## Sheet: Sheet1
A.Modified cone arrangement
(Er+Yb)/Sr	corrected 87Sr/86Sr	2SE	Rb/Sr	corrected	2SE
0.02	0.710256	8e-06	0.002	0.710264	9e-06
0.04	0.710245	7e-06	0.004	0.710266	8e-06
0.06	0.710264	8e-06	0.006	0.71028	9e-06
0.08	0.710246	9e-06	0.008	0.710275	1e-05
0.1	0.71024	9e-06	0.01	0.710279	9e-06
			0.02	0.710287	1.2e-05
B.Standard cone arrangement
(Er+Yb)/Sr	corrected 87Sr/86Sr	2SE	Rb/Sr	corrected	2SE
0.02	0.710262	1.3e-05	0.002	0.710233	1.4e-05
0.04	0.710265	1.4e-05	0.004	0.710243	1.6e-05
0.06	0.710257	1.2e-05	0.006	0.710242	1.6e-05
0.08	0.710259	1.4e-05	0.008	0.710253	1.5e-05
0.1	0.710251	1.4e-05	0.01	0.710232	1.6e-05
			0.02	0.710244	1.5e-05
